# Supplementary material for: Ru decorated with NiCoP: an efficient and durable hydrogen evolution reaction electrocatalyst in both acidic and alkaline conditions
Source: Royal Society of Chemistry journal article supplement (doi:10.1039/c7cc08340h), 2017-01-01
Supplement: c7cc08340h1.pdf [file c7cc08340h1.pdf]

***Supporting Information (SI) for***

**Ru decorated with NiCoP: an efficient and durable hydrogen evolution reaction electrocatalyst in both acidic and alkaline conditions**

Suli Liu,<sup>\*a</sup> Qinpu Liu,<sup>a</sup> Yun Lv,<sup>a</sup> Biyao Chen,<sup>a</sup> Quan Zhou,<sup>a</sup> Lei Wang,<sup>a</sup> Qiuhui Zheng,<sup>a</sup> Chenjing Che<sup>a</sup> and Changyun Chen<sup>\*a</sup>

<sup>a</sup>Department of Chemistry, Nanjing Xiaozhuang College, Nanjing 211171, P. R. China.

*E-mail: niuniu\_410@126.com*

## Experimental Section

### Chemicals

Dodecylamine (DDA), Oleic acid (OA), 20% Pt/C and 5 wt% Nafion were purchased from Alfa Aesar.  $\text{Co}(\text{acac})_2$ ,  $\text{Ni}(\text{HCOO})_2$ ,  $\text{Fe}(\text{Ac})_2$  and  $\text{RuCl}_3 \cdot n\text{H}_2\text{O}$  were purchased from ShangHai Guoyao Chemical Industry Co. Ltd. Trioctylphosphine (TOP, 90%) was purchased from Aladdin Industrial Corporation. Unless otherwise stated, all the above chemicals were used as received without further purification.

**Synthesis of NiCoP@Ru.** The NiCoP@Ru were prepared via a simple one-pot synthesis method. Firstly,  $\text{Ni}(\text{HCOO})_2$  (0.1116 g, 0.75 mmol),  $\text{Co}(\text{acac})_2$  (0.1782 g, 0.70 mmol),  $\text{RuCl}_3 \cdot n\text{H}_2\text{O}$  (0.1037 g, 0.5 mmol), TOP (5 mL), OA (1.5 mL) and DDA (3 mL) were mixed homogenously in a three-necked flask reactor. Then the reactor was heated to 320 °C in sand bath and maintained at this temperature for 30 min. Then, the reactor was naturally cooled to 50 °C. The reactor was again heated to 320 °C in sand bath and maintained at this temperature for 30 min. After the reaction, the generated black precipitate was centrifuged and separated with ethanol and heptane for several times. Finally, the as-obtained catalyst was dried in a vacuum oven overnight.

**Synthesis of other  $\text{Ni}_x\text{Co}_y\text{P}@Ru_z$ .** The synthesis of other  $\text{Ni}_x\text{Co}_y\text{P}@Ru_z$  was similar to that of NiCoP@Ru with different molar ratio of the introduced metal solid precursors.

**Synthesis of NiCoP.** The synthesis of NiCoP was similar to that of NiCoP@Ru but the  $\text{RuCl}_3 \cdot n\text{H}_2\text{O}$  was not added.

**Synthesis of Ru.** The synthesis of Ru was similar to that of NiCoP@Ru but the  $\text{Ni}(\text{HCOO})_2$ ,  $\text{Co}(\text{acac})_2$  and TOP were not added.

**Synthesis of FeCoP@Ru.** The synthesis of FeCoP@Ru was similar to that of NiCoP@Ru,  $\text{Fe}(\text{Ac})_2$  instead of  $\text{Ni}(\text{HCOO})_2$ .

### Sample Characterizations

The transmission electron microscopy (TEM) image was performed using a JEM-200CX instrument (Japan), and the corresponding acceleration voltage was 200 kV. The high resolution transmission electron microscopy (HRTEM), together with X-ray energy-dispersive spectra (EDS), elemental mapping, scanning transmission electron microscopy (STEM) and EDS line-scan images was acquired using JEOL-2100F apparatus at an acceleration voltage of 200 kV. The powder X-ray diffraction (XRD) pattern was recorded using a D/max 2500VL/PC diffractometer (Japan) equipped with graphite monochromatized Cu K $\alpha$  radiation ( $\lambda = 0.154060$  nm), and the corresponding scan range was 5° to 90° in 2 $\theta$  value. The X-ray photoelectron spectra (XPS) were recorded on a scanning X-ray microprobe (PHI 5000 Versa, ULACPHI, Inc.) that uses Al K $\alpha$  radiation. The binding energy of the C1s peak (284.6 eV) was employed as a standard to calibrate the binding energies of other elements. The electrochemical impedance spectra (EIS) test was carried out on an Autolab PGSTAT302N system in 0.5 M  $\text{H}_2\text{SO}_4$ .

### Electrochemical HER measurements

The electrochemical HER experiment was carried out on a CHI 660E electrochemical workstation (Shanghai, Chenhua Co.) with a standard three electrode system. A graphite rod electrode served as the counter electrode, while Ag/AgCl (3 M KCl) acted as the reference electrode and a glassy carbon electrode (GCE) (3 mm in diameter) was used as the working electrode. The catalyst dispersions were

prepared by mixing a certain amount of catalyst with the appropriate amount of water, ethanol, and Nafion (1.0 wt%) with a volume ratio of 3.8:1:0.2 under sonication for 40 min to form a homogeneous ink with a concentration of 5 mg mL<sup>-1</sup>. The catalyst suspension (4 µL) was dropped onto the GCE surface and air dried. All of the modified electrodes were pretreated by cycling the potential between -0.80 and 0.10 V for 100 cycles to remove any surface contamination prior to the electrochemical test. Cyclic voltammetry (CV) measurements were conducted in N<sub>2</sub>-saturated 0.5 M H<sub>2</sub>SO<sub>4</sub> and 1.0 M KOH aqueous solutions. All the potentials were referenced to a reversible hydrogen electrode (RHE).

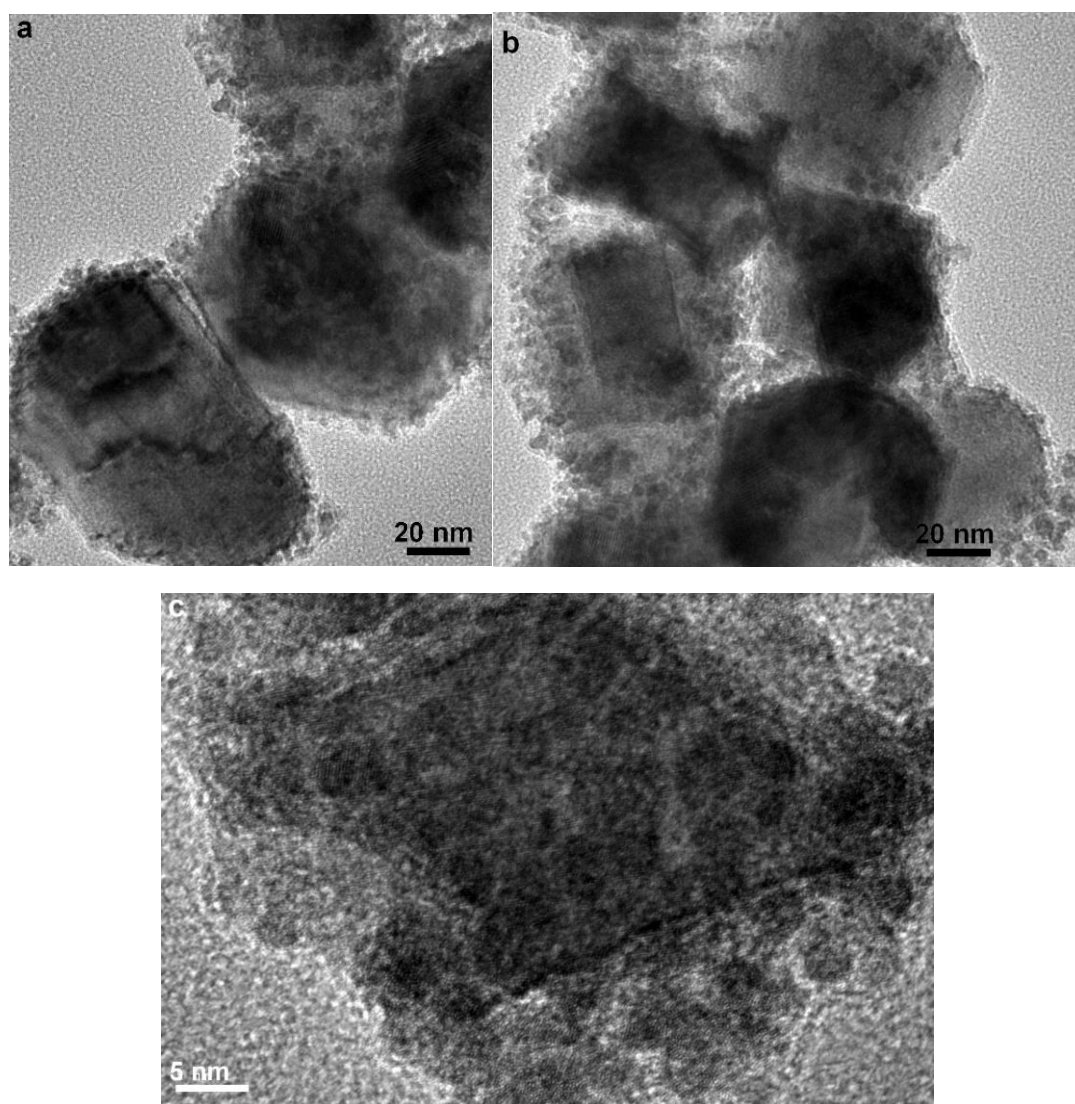

Fig. S1 (a) and (b) TEM and (c) HRTEM images of the NiCoP@Ru.

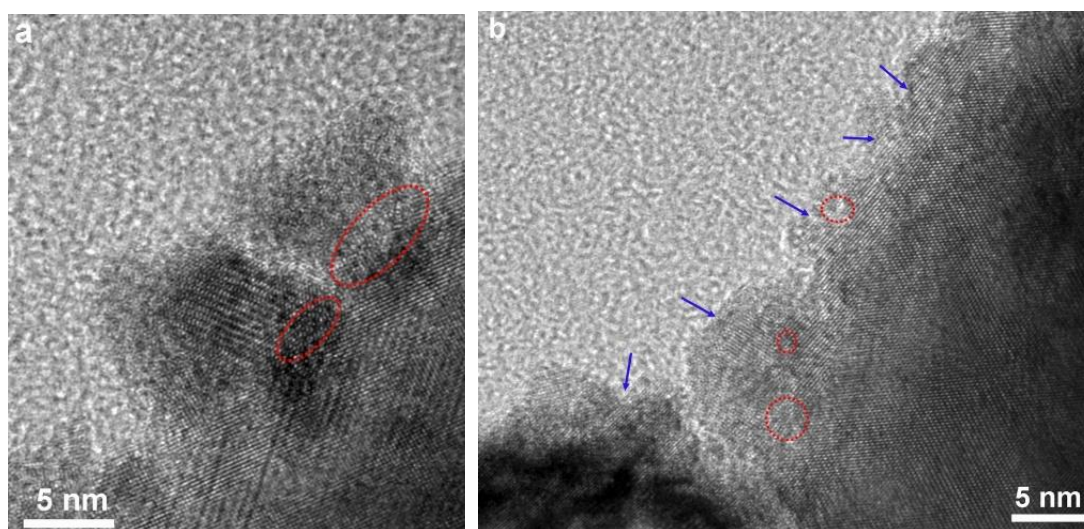

Fig. S2 (a) and (b) HRTEM images of the NiCoP@Ru.

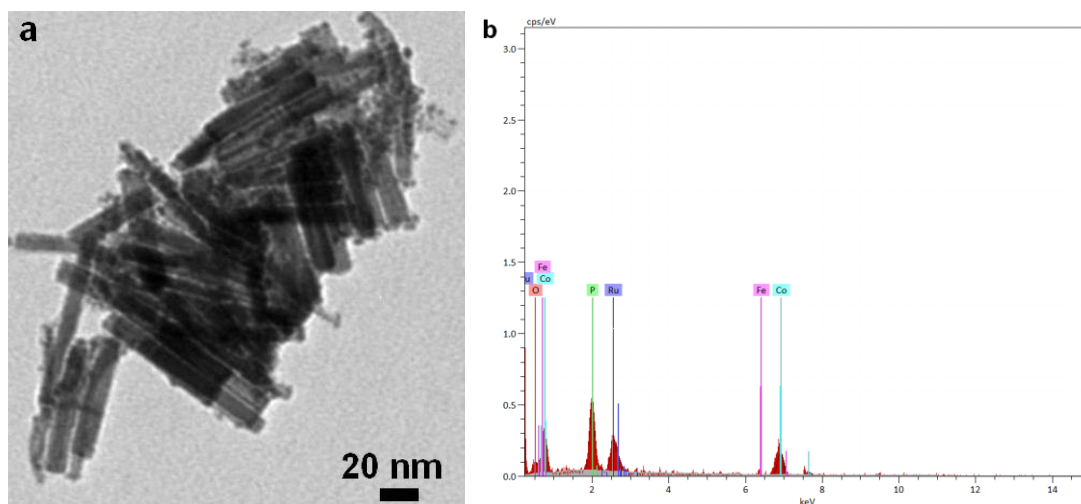

Fig. S3 (a) TEM image and (b) EDS of the FeCoP@Ru.

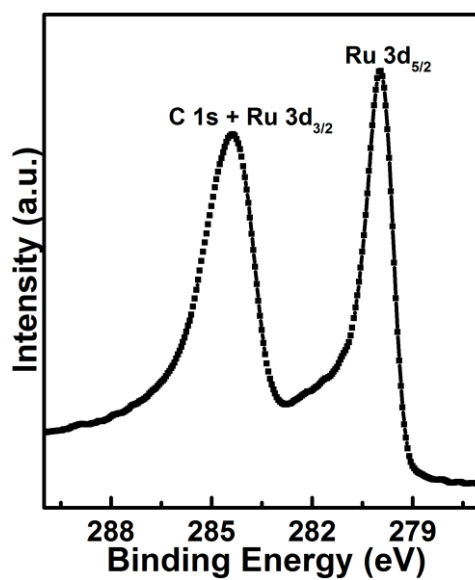

Fig.S4 high-resolution XPS spectra for Ru 3d of NiCoP@Ru.

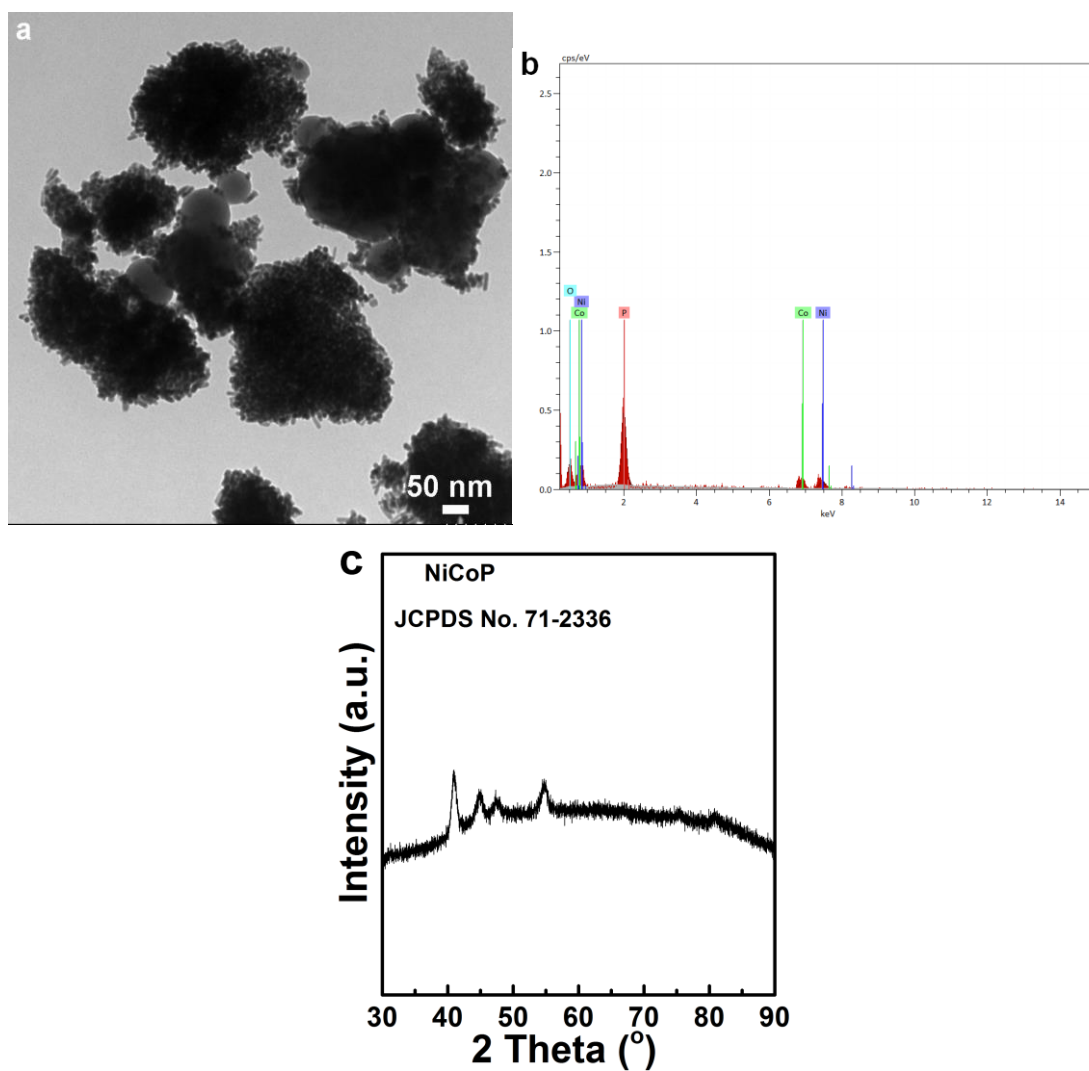

Fig. S5 (a) TEM image, (b) EDS and (c) XRD pattern of the NiCoP.

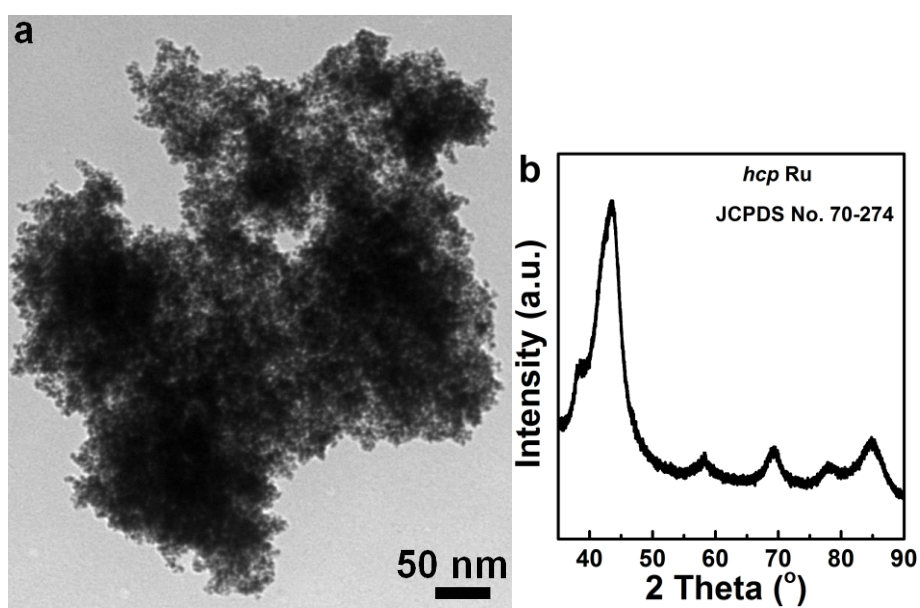

Fig. S6 (a) TEM image and (b) XRD pattern of the Ru.

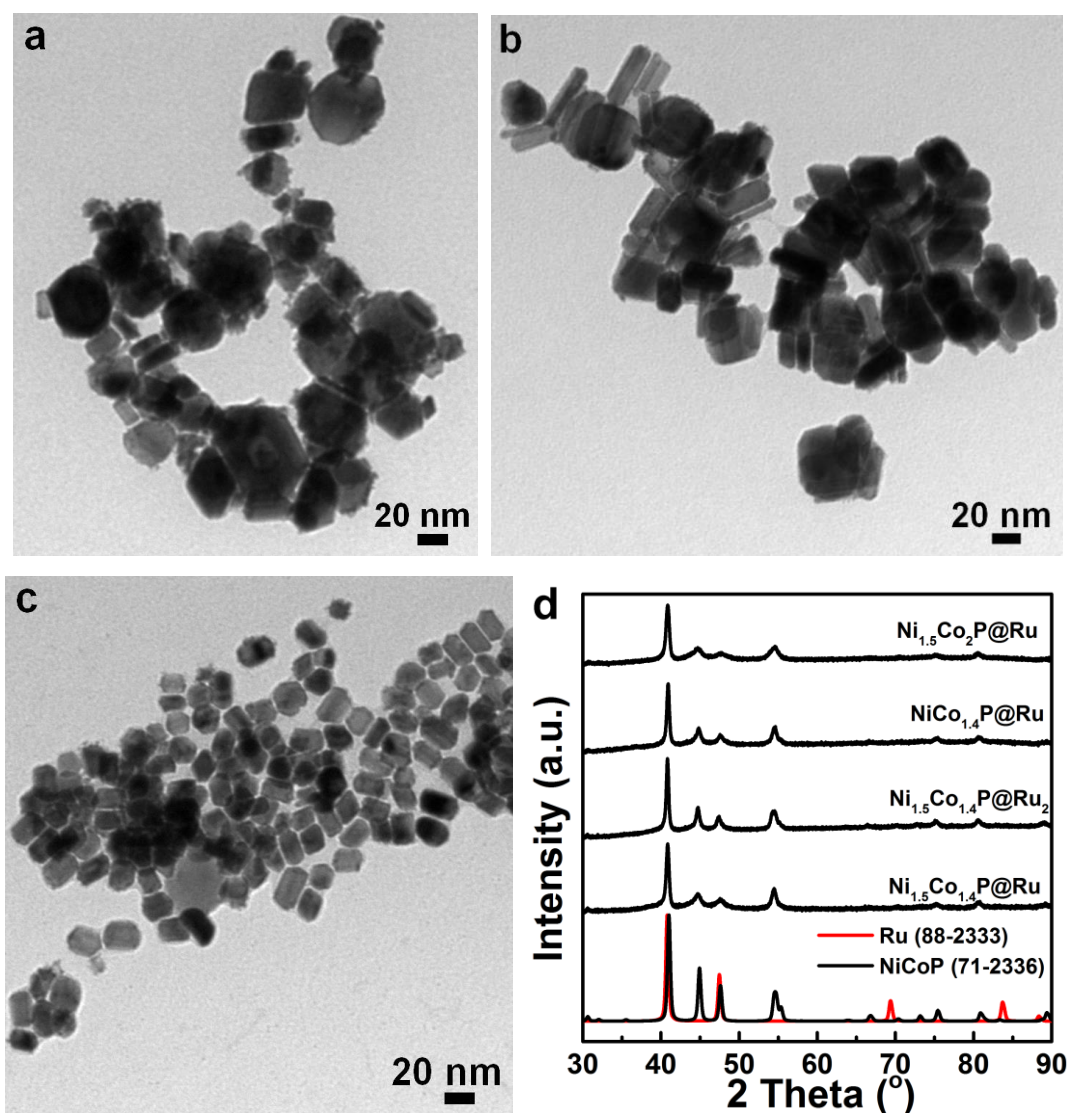

Fig. S7 TEM images of (a)  $\text{Ni}_{1.5}\text{Co}_{1.4}\text{P}@Ru_2$ , (b)  $\text{NiCo}_{1.4}\text{P}@Ru$ , and (c)  $\text{Ni}_{1.5}\text{Co}_2\text{P}@Ru$  and (d) XRD patterns of the  $\text{Ni}_x\text{Co}_y\text{P}@Ru_z$ .

**Table S1.** Comparisons of electrocatalytic HER properties of some recently reported catalysts in 0.5 M  $\text{H}_2\text{SO}_4$

| Catalyst                                    | Tafel slope<br>[mV dec <sup>-1</sup> ] | $\eta_{10}$ [mV] <sup>a</sup> | $j_0$ [mA cm <sup>-2</sup> ] <sup>b</sup> | Ref.                                                 |
|---------------------------------------------|----------------------------------------|-------------------------------|-------------------------------------------|------------------------------------------------------|
| $\text{Ni}_{1.5}\text{Co}_{1.4}\text{P}@Ru$ | 49                                     | 48                            | 1.26                                      | This work                                            |
| $\text{Ni}_{1.5}\text{Co}_{1.4}\text{P}$    | 39                                     | 99                            | $2.5 \times 10^{-4}$                      |                                                      |
| <b>Ru</b>                                   | 134                                    | 243                           | 0.15                                      |                                                      |
| $\text{NiCo}_2\text{P}_x$                   | 59.6                                   | 104                           | ~                                         | <i>Adv. Mater.</i> , 2017, <b>29</b> , 1605502.      |
| <b>ultrathin porous CoP<br/>nanosheets</b>  | 44                                     | 56                            | 0.61                                      | <i>Chem. Sci.</i> , 2017, <b>8</b> , 2769-2775.      |
| <b>Mo-Ni<sub>2</sub>P NWs/NF</b>            | 109                                    | 67                            | ~                                         | <i>Nanoscale</i> , 2017, DOI:<br>10.1039/C7NR03515B. |

|                                                     |      |      |        |                                                          |
|-----------------------------------------------------|------|------|--------|----------------------------------------------------------|
| (CoP) <sub>0.54</sub> -(FeP) <sub>0.46</sub> -NRs/G | 52   | 57   | 0.489  | <i>small</i> 2017, <b>13</b> , 1700092.                  |
| Ni <sub>2</sub> P/NiCoP@NCCs                        | 79   | 136  | ~      | <i>J. Mater. Chem. A</i> , 2017, <b>5</b> , 16568-16572. |
| Ce-doped CoP                                        | 54   | 54   | ~      | <i>Nano Energy</i> , 2017, <b>38</b> , 290-296.          |
| CoP@NC                                              | 59   | 129  | ~      | <i>ACS Catal.</i> 2017, <b>7</b> , 3824-3831.            |
| NiCoP                                               | 50   | 59   | ~      | <i>Adv. Funct. Mater.</i> , 2016, <b>26</b> , 6785-6796. |
| Co <sub>1.6</sub> Ni <sub>0.4</sub> P/CNT           | 46.7 | 91   | 0.0186 | <i>J. Mater. Chem. A</i> , 2016, <b>4</b> , 14675-14686. |
| MoS <sub>2</sub> @MoP                               | 76   | 108  | ~      | <i>Nanoscale</i> , 2016, <b>8</b> , 11052-11059.         |
| CoP                                                 | 50   | 75±2 | ~      | <i>Chem. Mater.</i> , 2015, <b>27</b> , 3769.            |
| CoPS film                                           | 57   | 128  | 0.056  | <i>Nature Mater.</i> , 2015, <b>14</b> , 1245.           |
| CoPS NPIs                                           | 56   | 48   | 0.984  |                                                          |
| CoP-N-C                                             | 42   | 91   | 0.16   | <i>ChemCatChem</i> , 2015, <b>7</b> , 1920-1925.         |
| Cu <sub>3</sub> P NW/CF                             | 67   | 143  | 0.18   | <i>Angew. Chem. Int. Ed.</i> , 2014, <b>126</b> , 9731.  |
| CoP/CNT                                             | 54   | 122  | 0.13   | <i>Angew. Chem. Int. Ed.</i> , 2014, <b>53</b> , 6710.   |

<sup>a</sup>The potential measured versus RHE.

<sup>b</sup>*j*<sub>0</sub> values were calculated from Tafel curves using an extrapolation method.

**Table S2.** Comparisons of electrocatalytic HER properties of some recently reported catalysts in alkaline electrolyte

| Catalyst                                                         | Tafel slope [mV dec <sup>-1</sup> ] | η <sub>10</sub> [mV]   | Electrolyte | Ref.                                                  |
|------------------------------------------------------------------|-------------------------------------|------------------------|-------------|-------------------------------------------------------|
| Ni <sub>1.5</sub> Co <sub>1.4</sub> P@Ru                         | 50                                  | 52 (η <sub>10</sub> )  | 1.0 M KOH   | This work                                             |
|                                                                  |                                     | 105 (η <sub>50</sub> ) | 1.0 M KOH   |                                                       |
| Ni <sub>0.89</sub> Co <sub>0.11</sub> Se <sub>2</sub><br>MNSN/NF | 52                                  | 85                     | 1.0 M KOH   | <i>Adv. Mater.</i> , 2017, <b>29</b> , 1606521.       |
| CuCoP/N-C                                                        | 122                                 | 220                    | 1.0 M KOH   | <i>Adv. Energy Mater.</i> , 2017, <b>7</b> , 1601555. |
| Hollow Cu <sub>2-x</sub> S@Ru<br>NPs                             | 48                                  | 82                     | 1.0 M KOH   | <i>Small</i> , 2017, <b>13</b> , 1700052.             |
| Mn-Co-P/Ti                                                       | 52                                  | 76                     | 1.0 M KOH   | <i>ACS Catal.</i> , 2017, <b>7</b> , 98-102.          |
| NiCoP/CC                                                         | 66.5                                | 62                     | 1.0 M KOH   | <i>ACS Catal.</i> , 2017, <b>7</b> ,                  |

|                                                   |       |                     |           |                                                                |
|---------------------------------------------------|-------|---------------------|-----------|----------------------------------------------------------------|
|                                                   |       |                     |           | 4131-4137.                                                     |
| Mn-Ni <sub>2</sub> P/NF                           | 135   | 103 ( $\eta_{20}$ ) | 1.0 M KOH | <i>Chem. Commun.</i> , 2017, <b>53</b> , 11048-11051.          |
| NiCoP-2.5-300 hollow quasi-polyhedra              | 42    | 124                 | 1.0 M KOH | <i>ACS Appl. Mater. Interfaces</i> 2017, <b>9</b> , 5982-5991. |
| NiCoP quasi-hollow nanocubes                      | 60.6  | 150                 | 1.0 M KOH | <i>Chem. Commun.</i> , 2016, <b>52</b> , 1633.                 |
| Ni-P/carbon paper                                 | 85.4  | 100                 | 1.0 M KOH | <i>Adv. Funct. Mater.</i> , 2016, <b>26</b> , 4067.            |
| Ni <sub>2</sub> P/Ni/NF                           | 72    | 98                  | 1.0 M KOH | <i>ACS Catal.</i> , 2016, <b>6</b> , 714-721.                  |
| NiCoP/rGO                                         | 124.1 | 209                 | 1.0 M KOH | <i>Adv. Funct. Mater.</i> , 2016, <b>26</b> , 6785-6796.       |
| Ni <sub>2</sub> P/NF                              | ~     | 220                 | 1.0 M KOH | <i>Energy Environ. Sci.</i> , 2015, <b>8</b> , 2347-2351.      |
| Ni <sub>5</sub> P <sub>4</sub> /Ni foil           | 53    | 150                 | 1.0 M KOH | <i>Angew. Chem. Int. Ed.</i> , 2015, <b>127</b> , 12538.       |
| Co <sub>0.59</sub> Fe <sub>0.41</sub> P nanocubes | 72    | 99                  | 1.0 M KOH | <i>Nanoscale</i> , 2015, <b>7</b> , 11055-11062.               |

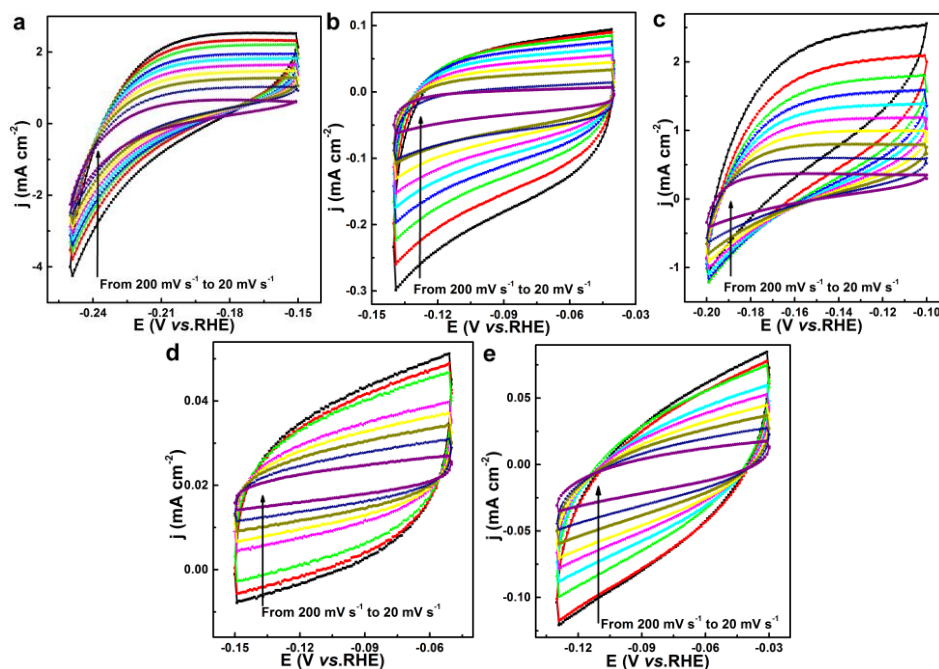

Fig. S8 CVs of (a) Co<sub>1.4</sub>Ni<sub>1.5</sub>P@Ru<sub>2</sub>, (b) Co<sub>1.4</sub>NiP@Ru, (c) Co<sub>2</sub>Ni<sub>1.5</sub>P@Ru, (d) Co<sub>1.4</sub>Ni<sub>1.5</sub>P, and (e) Ru with various scan rates (20-200 mV s<sup>-1</sup>).

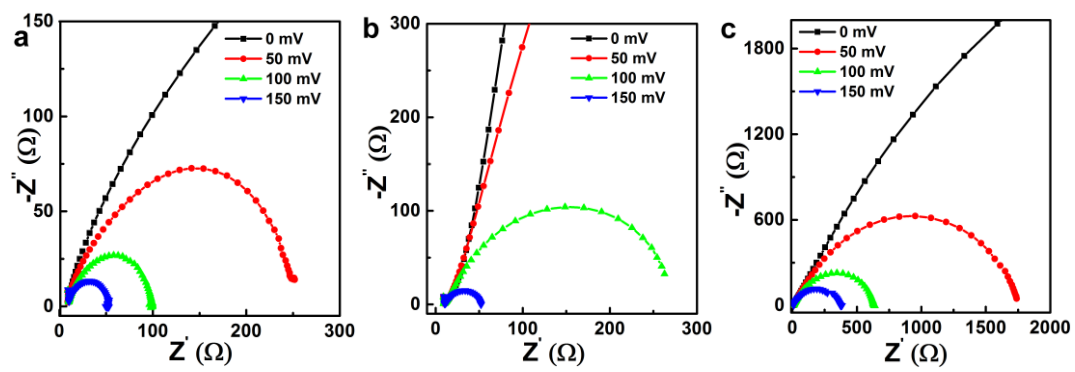

Fig. S9 Nyquist plots of (a)  $\text{Ni}_{1.5}\text{Co}_{1.4}\text{P}@Ru$ , (b)  $\text{Ni}_{1.5}\text{Co}_{1.4}\text{P}$ , and (c)  $Ru$ .
